# Supplementary material
Source: publisher figshare collection journal article supplement (https://acs.figshare.com/ndownloader/files/4463707)
Supplement: Supplementary file 1 [file 4463707]

# Supporting Information

## Hydroxylated Metabolites of 4-Monochlorobiphenyl and Its Metabolic Pathway in Whole Poplar Plants

Guangshu Zhai<sup>1\*</sup>, Hans-Joachim Lehmler<sup>2</sup>, Jerald L. Schnoor<sup>1</sup>

1. Department of Civil and Environmental Engineering and IIHR Hydrosience and  
Engineering, The University of Iowa, Iowa City, IA, 52242, USA

2. Department of Occupational and Environmental Health, The University of Iowa, Iowa  
City, IA, 52242, USA

\* Corresponding author: Tel: +1 319 335 5866;

E-mail: [zhai-guangshu@uiowa.edu](mailto:zhai-guangshu@uiowa.edu)

**Number of pages:** 3

**Number of figures:** 2

**Number of tables:** 2

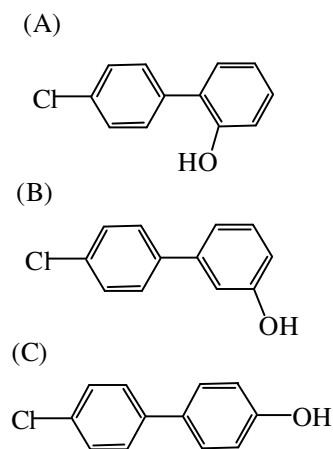

Fig. S1. Chemical structures of hydroxylated CB3 (A) 2'OH-CB3 (B) 3'OH-CB3, (C) 4'OH-CB3

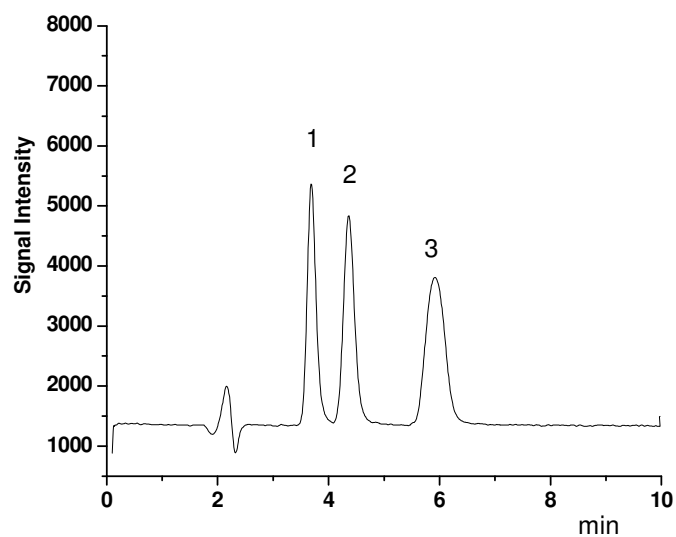

Fig. S2. Chromatograms of three OH-CB3s at the optimized conditions (1) 4'OH-CB3; (2) 3'OH-CB3; (3) 2'OH-CB3

**Analytical performance.** Table S1 shows the analytical performance data of this optimized HPLC-MS method. Compounds of 2'OH-CB3, 3'OH-CB3 and 4'OH-CB3 were baseline separated in less than 10 minutes. Linear calibration curves, based on peak areas to concentration, were obtained in the range of 1.0–100.0 ng ml<sup>-1</sup>, with correlation coefficients of 0.9996, 0.9999 and 0.9996 (n=3) for 2'OH-CB3, 3'OH-CB3 and 4'OH-CB3, respectively. The relative standard deviations measured at the 10.0 ng ml<sup>-1</sup> level for 2'OH-CB3 and 3'-OH-CB3 and the 5.0 ng ml<sup>-1</sup> level for 4'OH-CB3 were in the range of 1.18-1.45% (n= 5). Calculated detection limits (*S/N* = 3) of 2'OH-CB3, 3'OH-CB3 and 4'OH-CB3 were 0.127, 0.117 and 0.034 ng ml<sup>-1</sup>, respectively.

**Table S1.** Some analytical performance data of the proposed method.

| Compound | Calibration curve               | Correlation coefficient | Detection limit<br>(ng ml <sup>-1</sup> ) | RSD<br>(%, n = 5) <sup>a</sup> |
|----------|---------------------------------|-------------------------|-------------------------------------------|--------------------------------|
| 2'OH-CB3 | Y = 1.61×10 <sup>4</sup> X      | 0.9996                  | 0.127                                     | 1.18                           |
| 3'OH-CB3 | Y = 1.42×10 <sup>4</sup> X-1454 | 0.9999                  | 0.117                                     | 1.45                           |
| 4'OH-CB3 | Y = 2.33×10 <sup>4</sup> X-1260 | 0.9996                  | 0.034                                     | 1.21                           |

<sup>a</sup>, Standard concentration, 2'OH-CB3 and 3'OH-CB3 10.0 ng ml<sup>-1</sup>; 4'OH-CB3 5.0 ng ml<sup>-1</sup>;

**Table S2.** Recoveries of OH-CB3s in hydroponic solution and different parts of blank poplars with spiked masses: 2'OH-CB3 0.4 µg, 3'OH-CB3 0.4 µg and 4'OH-CB3 0.2 µg (%, n = 3)

| Compound | Hydroponic solution | Root     | Wood     | Bark     | Leaf     |
|----------|---------------------|----------|----------|----------|----------|
| 2'OH-CB3 | 95.6±0.3            | 89.8±5.5 | 92.9±1.6 | 85.9±6.4 | 81.7±4.7 |
| 3'OH-CB3 | 88.2±0.5            | 83.5±4.2 | 84.3±3.5 | 81.0±4.3 | 76.4±3.9 |
| 4'OH-CB3 | 95.5±0.6            | 88.5±2.8 | 87.1±7.8 | 81.5±5.1 | 85.2±6.4 |
